# Supplementary material
Source: Research Square preprint supplement (doi:10.21203/rs.3.rs-9333636/v1)

Fig 6G

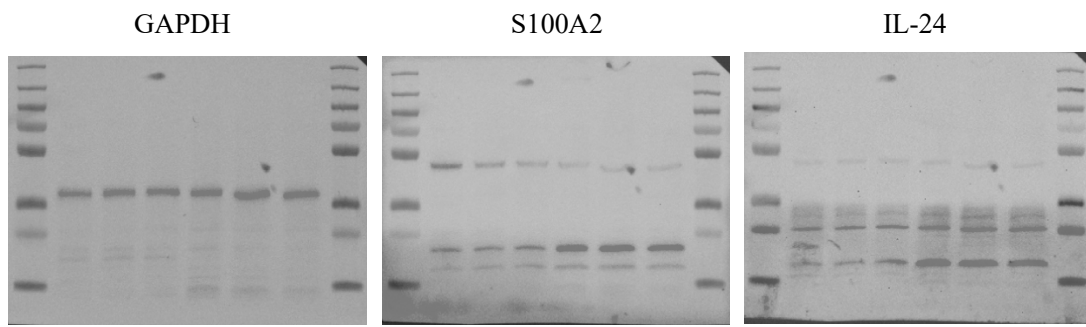

Fig 6J

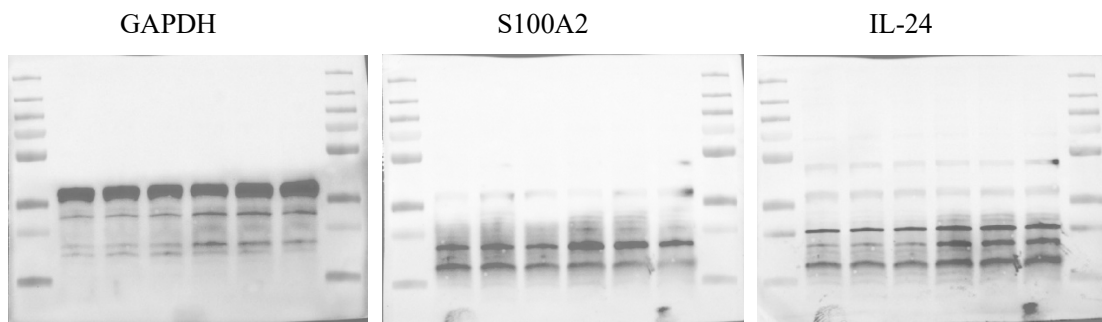

Fig 10B

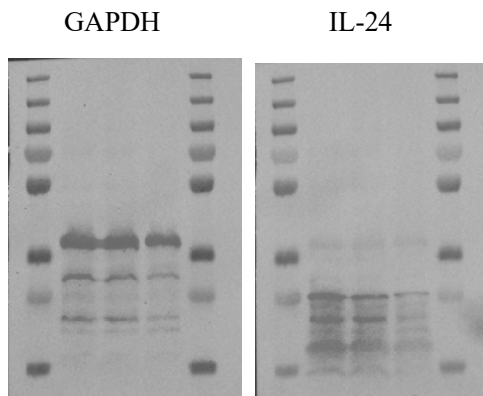

Fig 10C

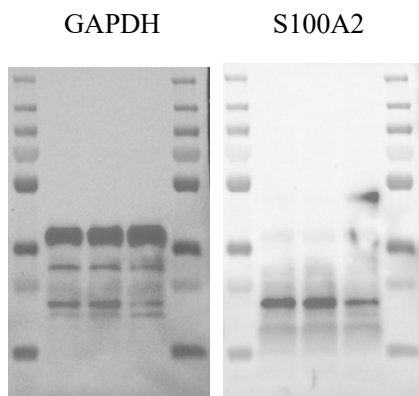

Supplement: Supplementary file 1 [file b91ed7f1c94f650cefa33529.pdf]
